# Supplementary material for: Effects of Pleiotrophin Overexpression on Mouse Skeletal Muscles in Normal Loading and in Actual and Simulated Microgravity
Source: PLoS One. 2013 Aug 28;8(8):e72028. doi: 10.1371/journal.pone.0072028 (PMC3756024; doi:10.1371/journal.pone.0072028)
Supplement: Figure S1 — (PDF) [file pone.0072028.s001.pdf]

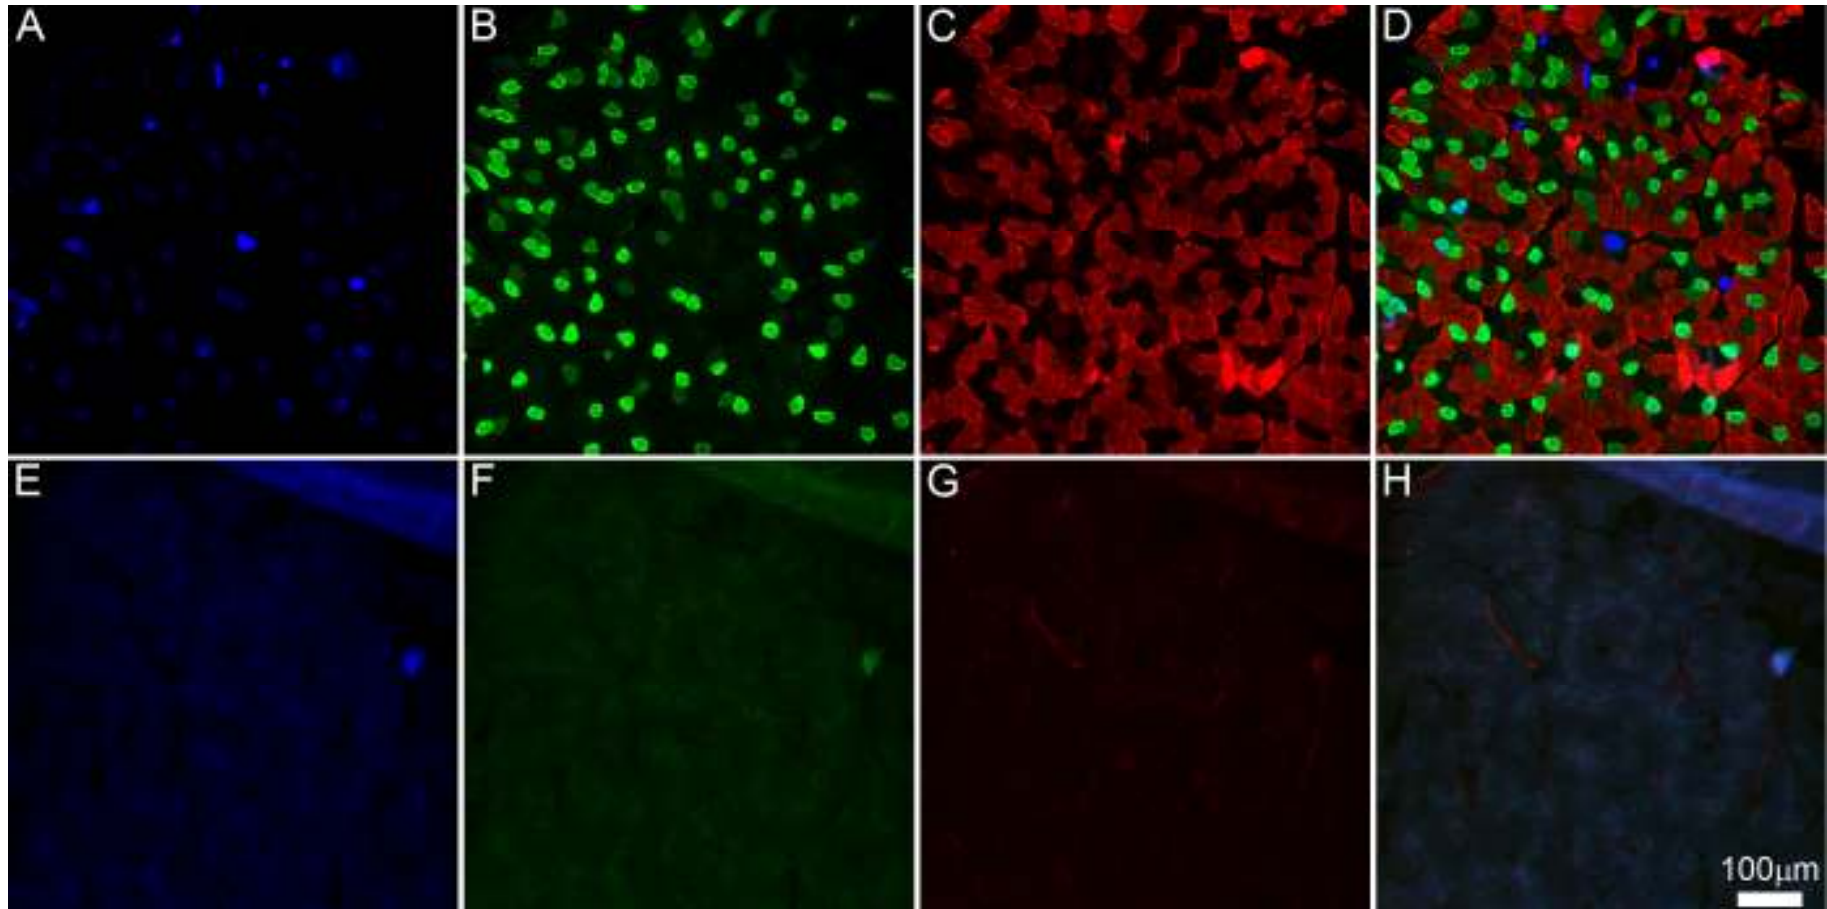

Figure S1

Muscles were incubated with BA-D5 (MyHC-slow specific, **A**), SC71 (MyHC-2A specific, **B**) or BF-F3 (MyHC-2B specific, **C**) primary antibodies. A mock incubation with primary antibody solution diluent (PBS plus 0.5% BSA) was performed on serial sections in parallel, to check for background fluorescence (**E**, **F**, **G**). Secondary antibodies were then used as described in the materials and methods section. **D**, merge of **A**, **B** and **C**. **H**, merge of **E**, **F** and **G**. Increased background in **E**, **F**, **G**, **H** is due to longer exposure time (1.5 s) compared with **A**, **B**, **C** and **D** (0.8 s), to allow for visualization of the fibers.

**Camerino et al., Effects of pleiotrophin overexpression on mouse skeletal muscles in normal loading and in actual and simulated microgravity**
