# Supplementary material for: Effects of Pleiotrophin Overexpression on Mouse Skeletal Muscles in Normal Loading and in Actual and Simulated Microgravity
Source: PubMed Central journal article supplement (PMC3756024; doi:10.1371/journal.pone.0072028), 2013-08-28
Supplement: pone.0072028.s002.pdf [file pone.0072028.s002.pdf]

**TABLE S1:** Quantitative real-time PCR primers

| <i>Protein</i>                                                             | <i>gene</i>     | <i>NCBI sequence</i>                                              | <i>TaqMan Probe</i>                             | <i>forward primer (5' → 3')</i> | <i>reverse primer (3' → 5')</i> | <i>amplicon</i> | <i>efficiency</i> |
|----------------------------------------------------------------------------|-----------------|-------------------------------------------------------------------|-------------------------------------------------|---------------------------------|---------------------------------|-----------------|-------------------|
| Chloride channel 1 (ClC-1)                                                 | <i>Clcn1</i>    | NM_013491.2                                                       | ATTGGCTGAGACACTTGT                              | TCATGCTCGGTGTCCGAAA             | CAGGCGGTGCTTAGCAAGA             | 59              | 92                |
| Ca <sup>2+</sup> -activated K <sup>+</sup> channel $\alpha$ 1-subunit (BK) | <i>Kcnma1</i>   | NM_010610.3                                                       | CAGAGTCCTGGTTGTGTTA                             | GATATCCGCCACAGACTGACT           | AGTATATTACGAGGGCACCAATGC        | 80              | 95                |
| ATP-sensitive K <sup>+</sup> channel (Kir6.2)                              | <i>Kcnj11</i>   | NM_010602.2                                                       | CTGGCTCCTAGTGACCTG                              | CTCATCATCTACCACGTCATCGA         | GTTTCTACCACGCCTTCCAAGA          | 116             | 90                |
| ATP-sensitive K <sup>+</sup> channel (SUR2A)                               | <i>Abcc9</i>    | NM_021041.2                                                       | CATAGCTCATCGGGTTC                               | CGGATCGCACGGTCGTA               | TAACCAGGTCTGCAGTCAGAATG         | 63              | 93                |
|                                                                            |                 |                                                                   | <b>Reference number from Applied Biosystems</b> |                                 |                                 |                 |                   |
| hypoxanthine guanine phosphoribosyl transferase 1                          | <i>Hprt</i>     | NM_013556.2                                                       | Mm_00446968_m1                                  |                                 |                                 | 65              | 98                |
| Sodium channel $\alpha$ -subunit (Nav1.4)                                  | <i>Scn4a</i>    | NM_133199.2                                                       | Mm_01258366_m1                                  |                                 |                                 | 86              | 94                |
| Sodium channel $\beta$ 1-subunit (Nav2.1)                                  | <i>Scn1b</i>    | NM_011322.2                                                       | Mm_00441210_m1                                  |                                 |                                 | 86              | 97                |
| ATP-sensitive K <sup>+</sup> channel, SUR1                                 | <i>Abcc8</i>    | NM_011510.3                                                       | Mm_01701349_m1                                  |                                 |                                 | 82              | 99                |
| Atrogin1 E3 ligase                                                         | <i>Fbxo32</i>   | NM_026346.3                                                       | Mm_00624629_m1                                  |                                 |                                 | 72              | 91                |
| MuRF-1 E3 ligase                                                           | <i>Trim63</i>   | NM_001039048.2                                                    | Mm_01185221_m1                                  |                                 |                                 | 57              | 89                |
| PGC-1 $\alpha$                                                             | <i>Ppargc1a</i> | NM_008904.2                                                       | Mm_01208835_m1                                  |                                 |                                 | 68              | 91                |
| cytochrome c oxidase subunit IV (COXIV)                                    | <i>Cox4i1</i>   | NM_009941.2                                                       | Mm_01250094_m1                                  |                                 |                                 | 106             | 90                |
| citrate synthase                                                           | <i>Cs</i>       | NM_026444.3                                                       | Mm_00466043_m1                                  |                                 |                                 | 57              | 89                |
| vascular endothelial growth factor A                                       | <i>Vegfa</i>    | NM_001025250.3<br>NM_001110266.1<br>NM_001110267.1<br>NM_009505.4 | Mm_01281449_m1                                  |                                 |                                 | 81              | 92                |
| vascular endothelial growth factor B                                       | <i>Vegfb</i>    | NM_011697.3<br>NM_001185164.1                                     | Mm_00442102_m1                                  |                                 |                                 | 93              | 95                |
| kinase insert domain protein receptor                                      | <i>Kdr</i>      | NM_010612.2                                                       | Mm_01222421_m1                                  |                                 |                                 | 64              | 97                |
| vasohibin 1                                                                | <i>Vash1</i>    | NM_177354.4                                                       | Mm_00616592_m1                                  |                                 |                                 | 90              | 91                |
